# Supplementary material for: A high performance all-vanadate-based Li-ion full cell
Source: Royal Society of Chemistry journal article supplement (doi:10.1039/d1ta01170g), 2021-01-01
Supplement: d1ta01170g1.pdf [file d1ta01170g1.pdf]

## Supporting information

### High Performance All-Vanadate-Based Li-Ion Full Cell

Jie Xu, Dongmei Zhang, Zongping Zhang, and Shibing Ni\*

College of Materials and Chemical Engineering, Key Laboratory of Inorganic Nonmetallic Crystalline and Energy Conversion Materials, China Three Gorges University, Yichang, 443002, China. E-mail address: [shibingni07@126.com](mailto:shibingni07@126.com);

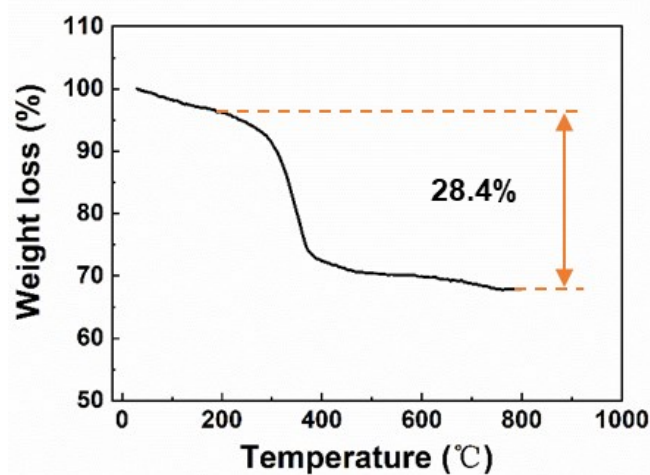

Figure S1. Thermogravimetric analysis of the LVO/NC PMSs.

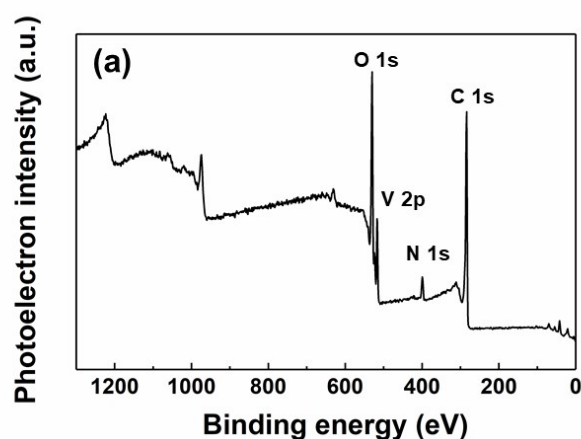

Figure S2. The survey XPS spectrum of the LVO/NC PMSs.

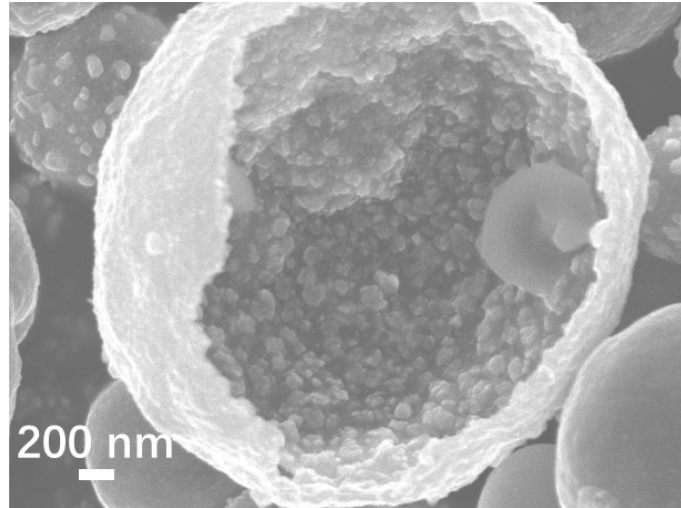

**Figure S3.** SEM image of a cracked LVO/NC PMS.

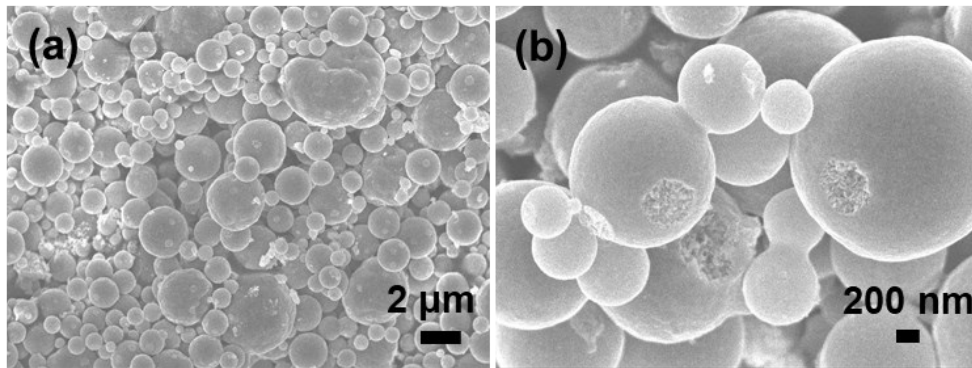

**Figure S4.** (a) Low and (b) high magnification SEM images of dense LVO/NC spheres obtained via concentrating the precursor solution to its 50% volume.

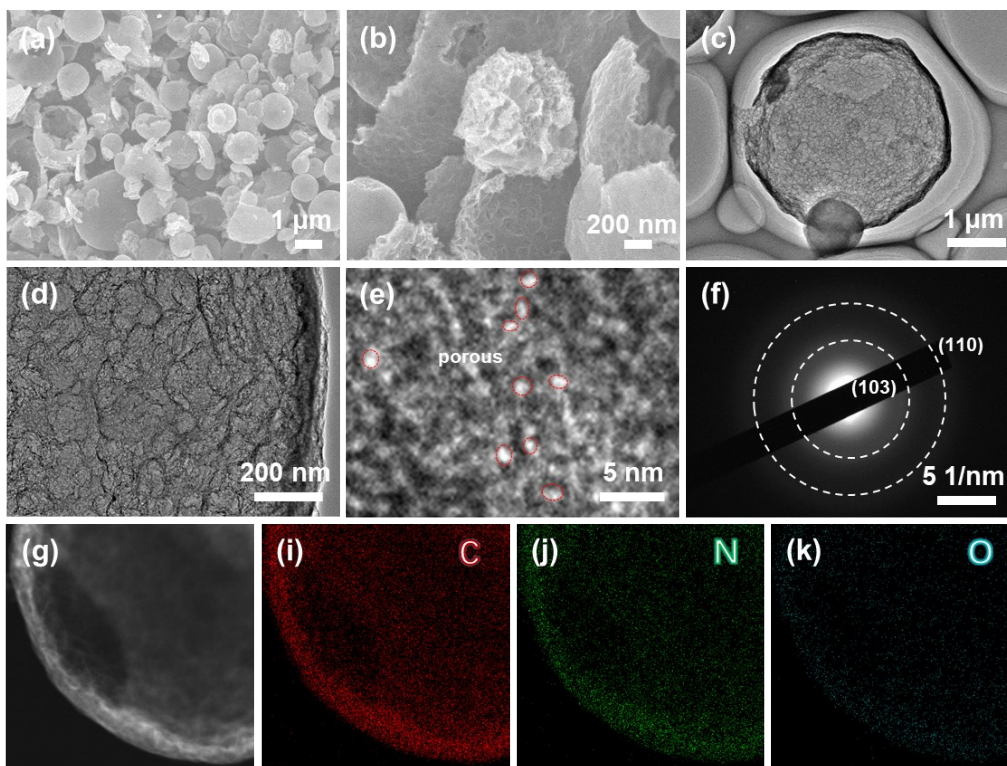

**Figure S5.** Morphological and microstructural characterizations of the products obtained via etching  $\text{Li}_3\text{VO}_4$  in the LVO/NC PMS. (a, b) SEM and (c-e) TEM images. (f) SAED pattern. (g) Scanning TEM image and (i-k) the corresponding elemental mapping images of C, N, and O, respectively.

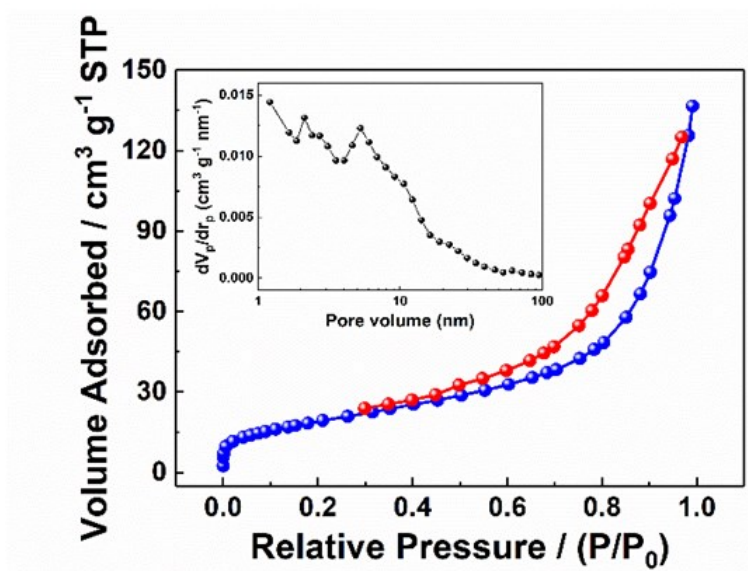

**Figure S6.** Nitrogen physisorption isotherms and (inset) pore size distributions of the LVO/NC PMSs.

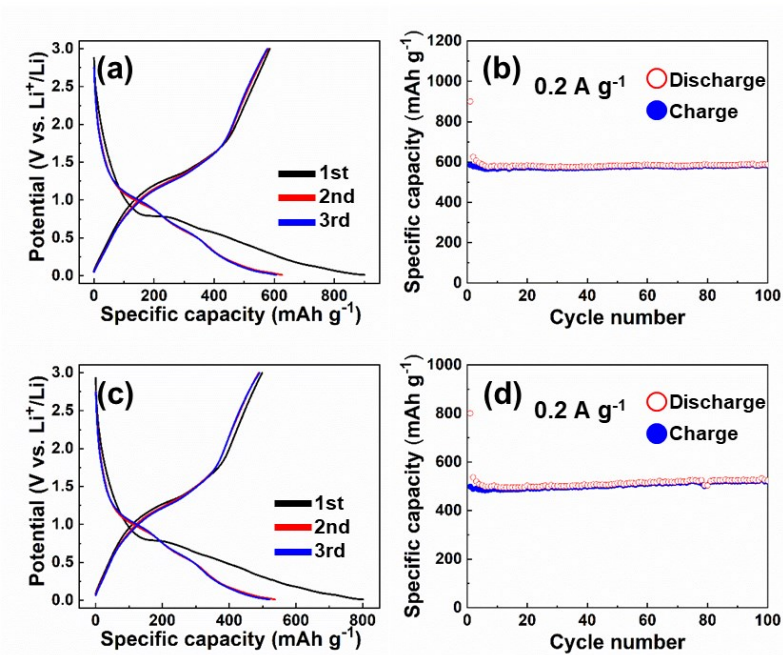

**Figure S7.** Electrochemical performance of the LVO/NC at specific current of  $0.2 \text{ A g}^{-1}$ . (a, b) for LVO/NC PMSs. (c, d) for dense LVO/NC spheres.

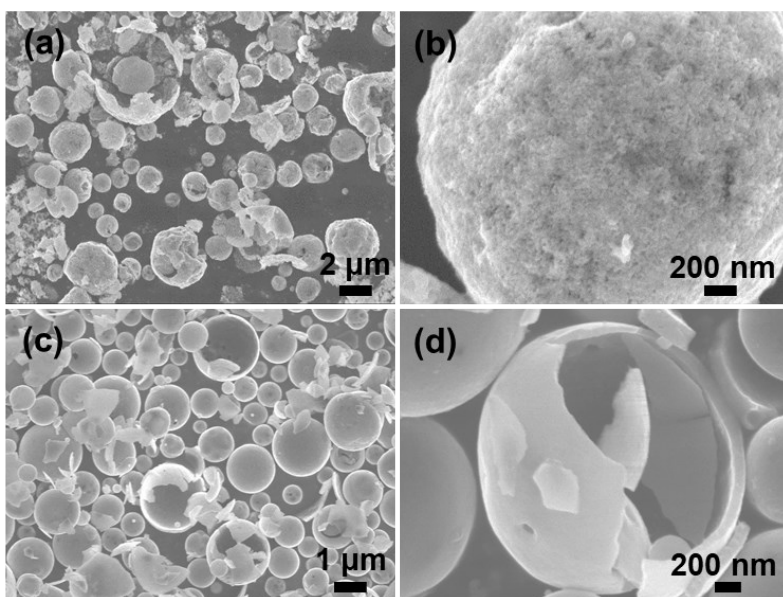

**Figure S8.** SEM images of LVO/NC spheres with different theoretical C content. (a, b) for 10%. (c, d) for 50%.

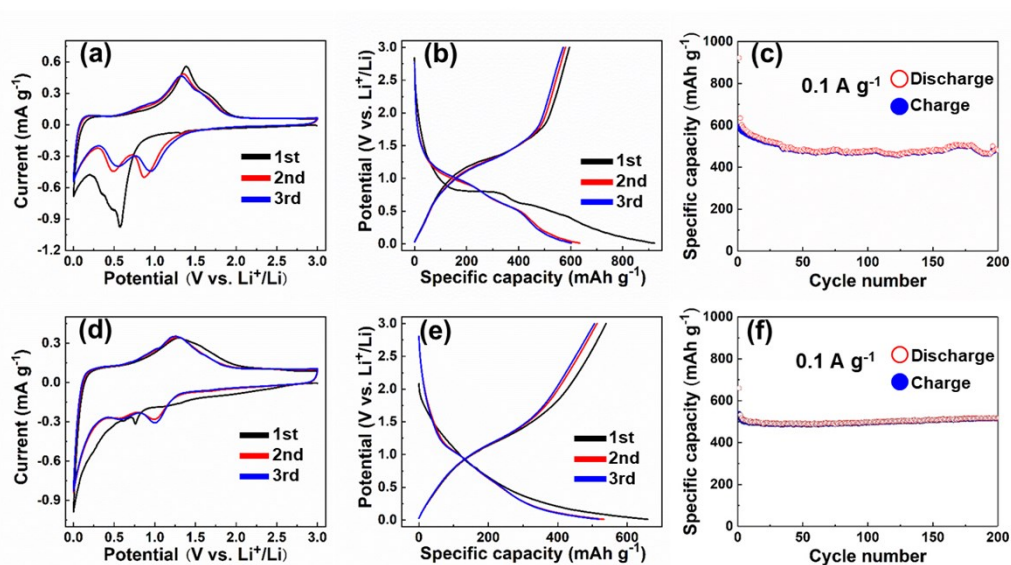

**Figure S9.** Electrochemical performance of the LVO/NC spheres with different theoretical C content. (a-c) for 10% C. (d-f) for 50% C.

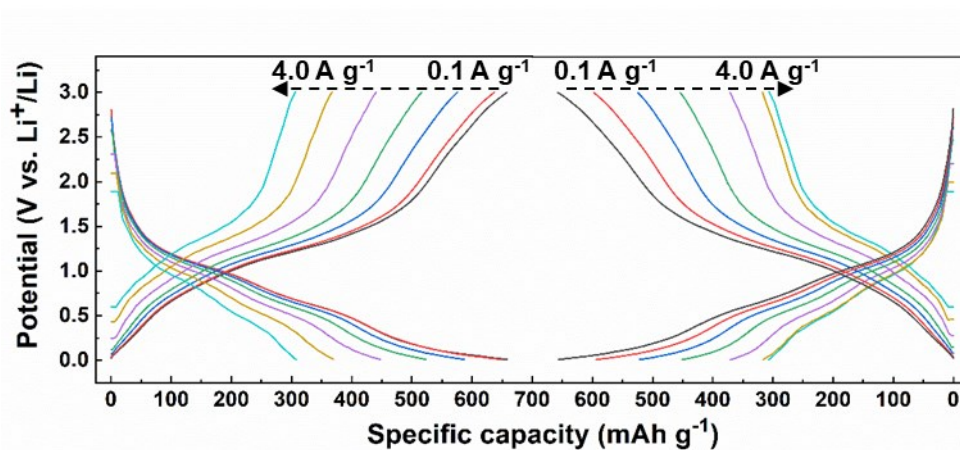

**Figure S10.** Representative charge/discharge curves in the second period rate performance testing in Figure 4 d.

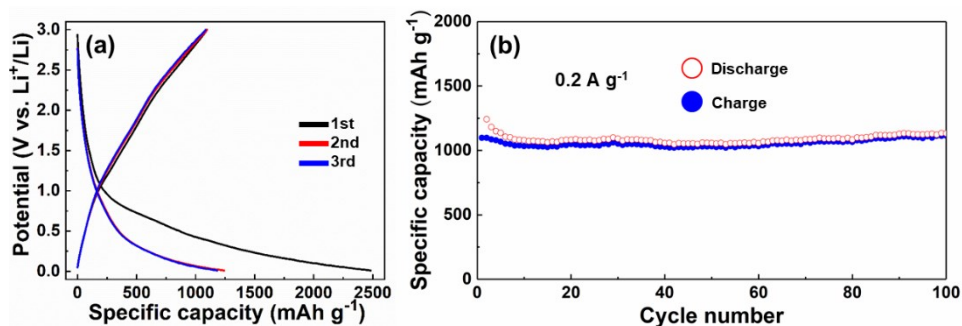

**Figure S11.** (a) The initial three charge/discharge curves and (b) cycle performance of NC obtained via etching  $\text{Li}_3\text{VO}_4$  in the LVO/NC PMS.

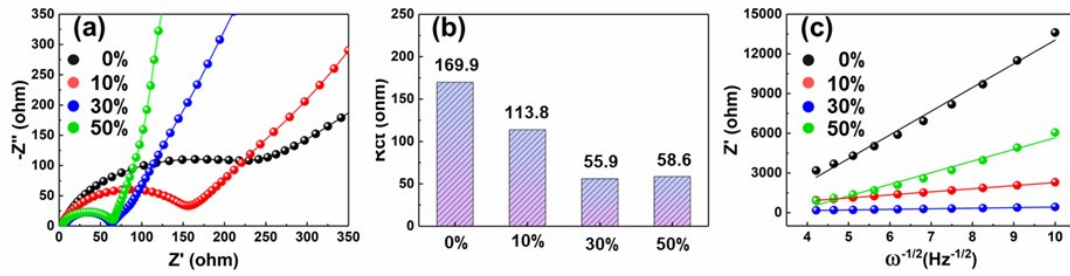

**Figure S12.** Electrochemical reaction kinetics of LVO/NC electrodes with different C component. (a) EIS spectra, (b) the fitted  $R_{ct}$  and (c) Nyquist plots of the real parts of the complex impedance versus  $\omega^{-1/2}$ .

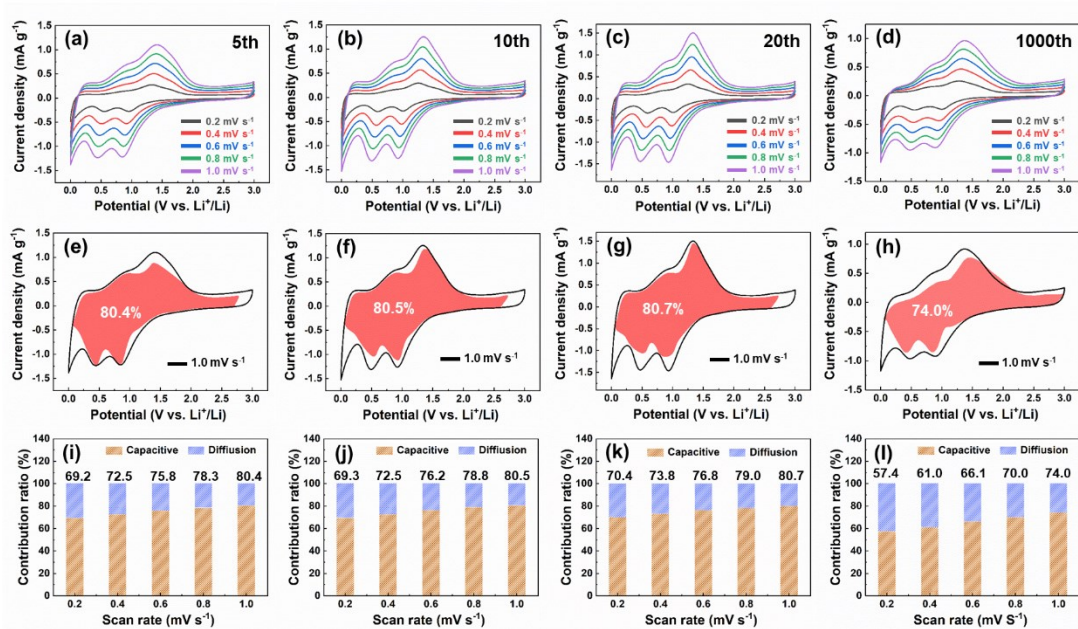

**Figure S13.** Li-ion storage electrochemistry of the LVO/NC PMSs. (a-d) CV curves at different scan rates; (e-h) fitted pseudocapacitive contribution in charge storage; (i-l) pseudocapacitive charge storage contribution vs. scan rate; (a, e, i) for electrode after 5 cycles, (b, f, j) for electrode after 10 cycles, (c, g, k) for electrode after 20 cycles, (d, h, l) for electrode after 1000 cycles.

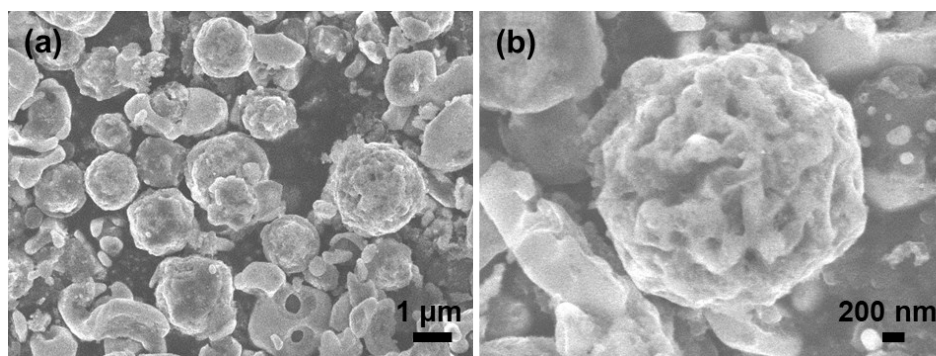

**Figure S14.** SEM images of LVP/C spheres with (a) low and (b) high magnification.

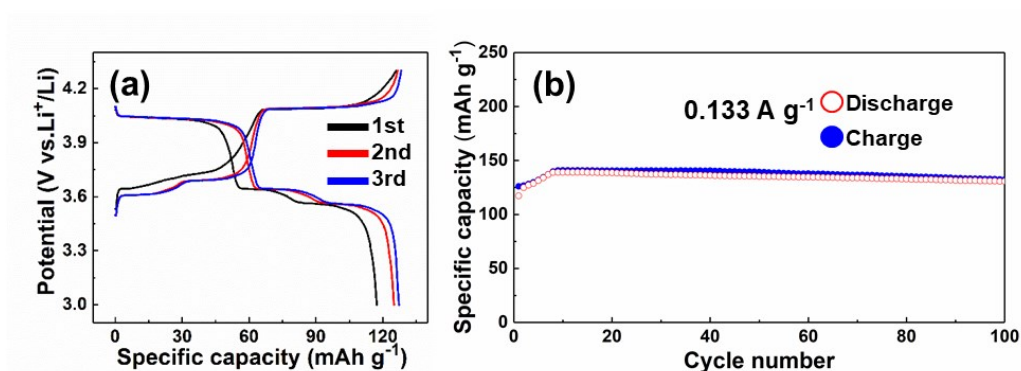

**Figure S15.** Electrochemical performance of LVP/C spheres with (a) the initial three charge/discharge curves and (b) Cycle performance at 1 C.

**Table S1.** The summarization of cycling performance of various LTO- and LVO-based full cells.

| Material                           | Discharge current<br>(mA g <sup>-1</sup> ) | Capacity<br>(mAh g <sup>-1</sup> ) | Cycle<br>number | Ref.      |
|------------------------------------|--------------------------------------------|------------------------------------|-----------------|-----------|
| LVO//LFP                           | 72                                         | 170                                | 200             | 40        |
| LVO//LNMO                          | 1200                                       | 295                                | 500             | 41        |
| LVO//V <sub>2</sub> O <sub>5</sub> | 1000                                       | 71.7                               | 1500            | 63        |
| LTO//LVP                           | 65                                         | 104                                | 30              | 69        |
| LTO//LVP                           | 650                                        | 120                                | 300             | 71        |
| LTO//LFP                           | 17                                         | 68                                 | 50              | 73        |
| LTO//LFP                           | 34                                         | 83                                 | 300             | 74        |
| LTO//LFP                           | ~14                                        | 100                                | 100             | 76        |
| LTO//LFP                           | ~500                                       | 122                                | 200             | 77        |
| LVO//LFP                           | 400                                        | 350                                | 100             | 78        |
| LVO//LVP                           | 1000                                       | 340.7                              | 1000            | This work |
